# Supplementary material for: Bivalent individualization during chromosome territory formation in Drosophila spermatocytes by controlled condensin II protein activity and additional force generators
Source: PubMed Central journal article supplement (PMC8559962; doi:10.1371/journal.pgen.1009870), 2021-10-20

**A**

S1/2

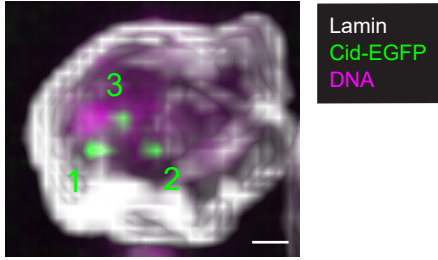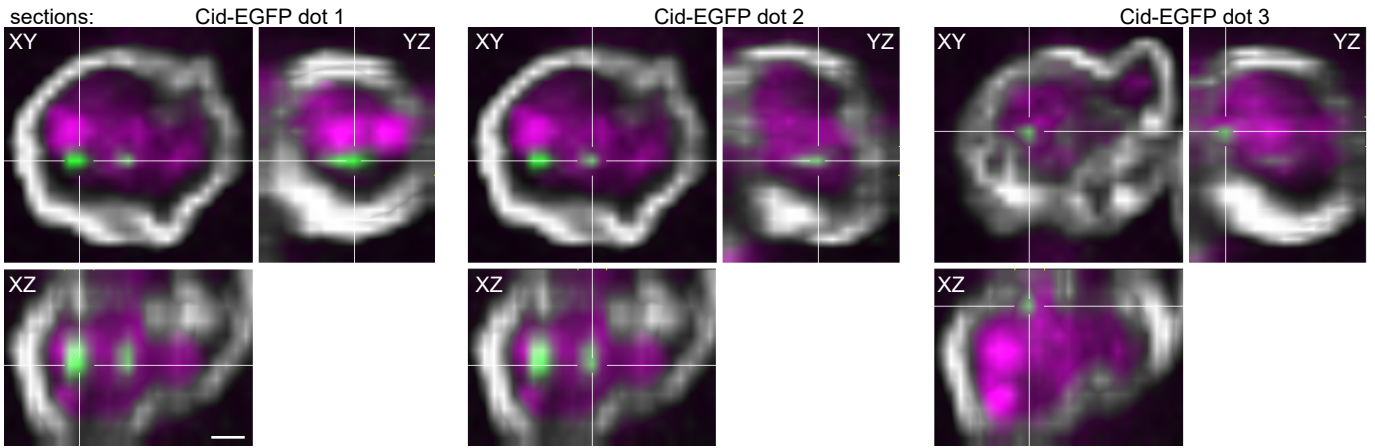

S3

S4

S5

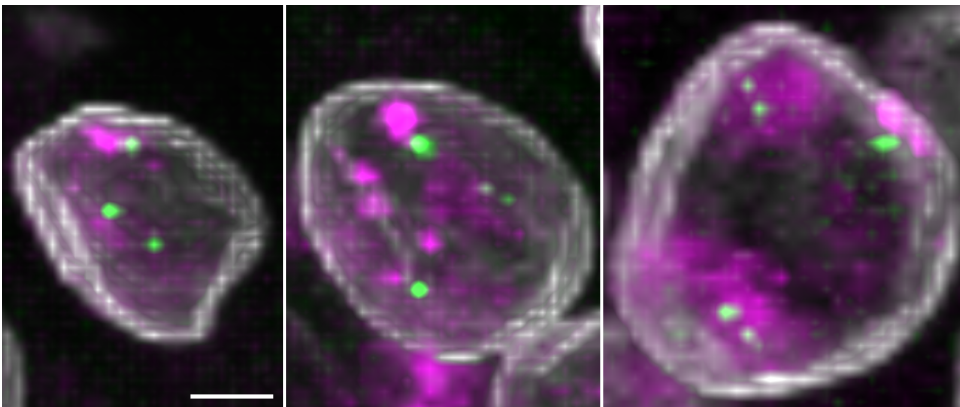**B**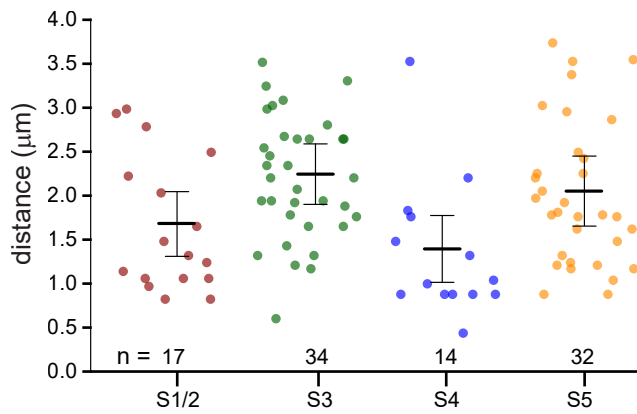

Supplement: pgen.1009870.s002.pdf [file pgen.1009870.s002.pdf]
