# Supplementary material for: Bivalent individualization during chromosome territory formation in Drosophila spermatocytes by controlled condensin II protein activity and additional force generators
Source: PubMed Central journal article supplement (PMC8559962; doi:10.1371/journal.pgen.1009870), 2021-10-20

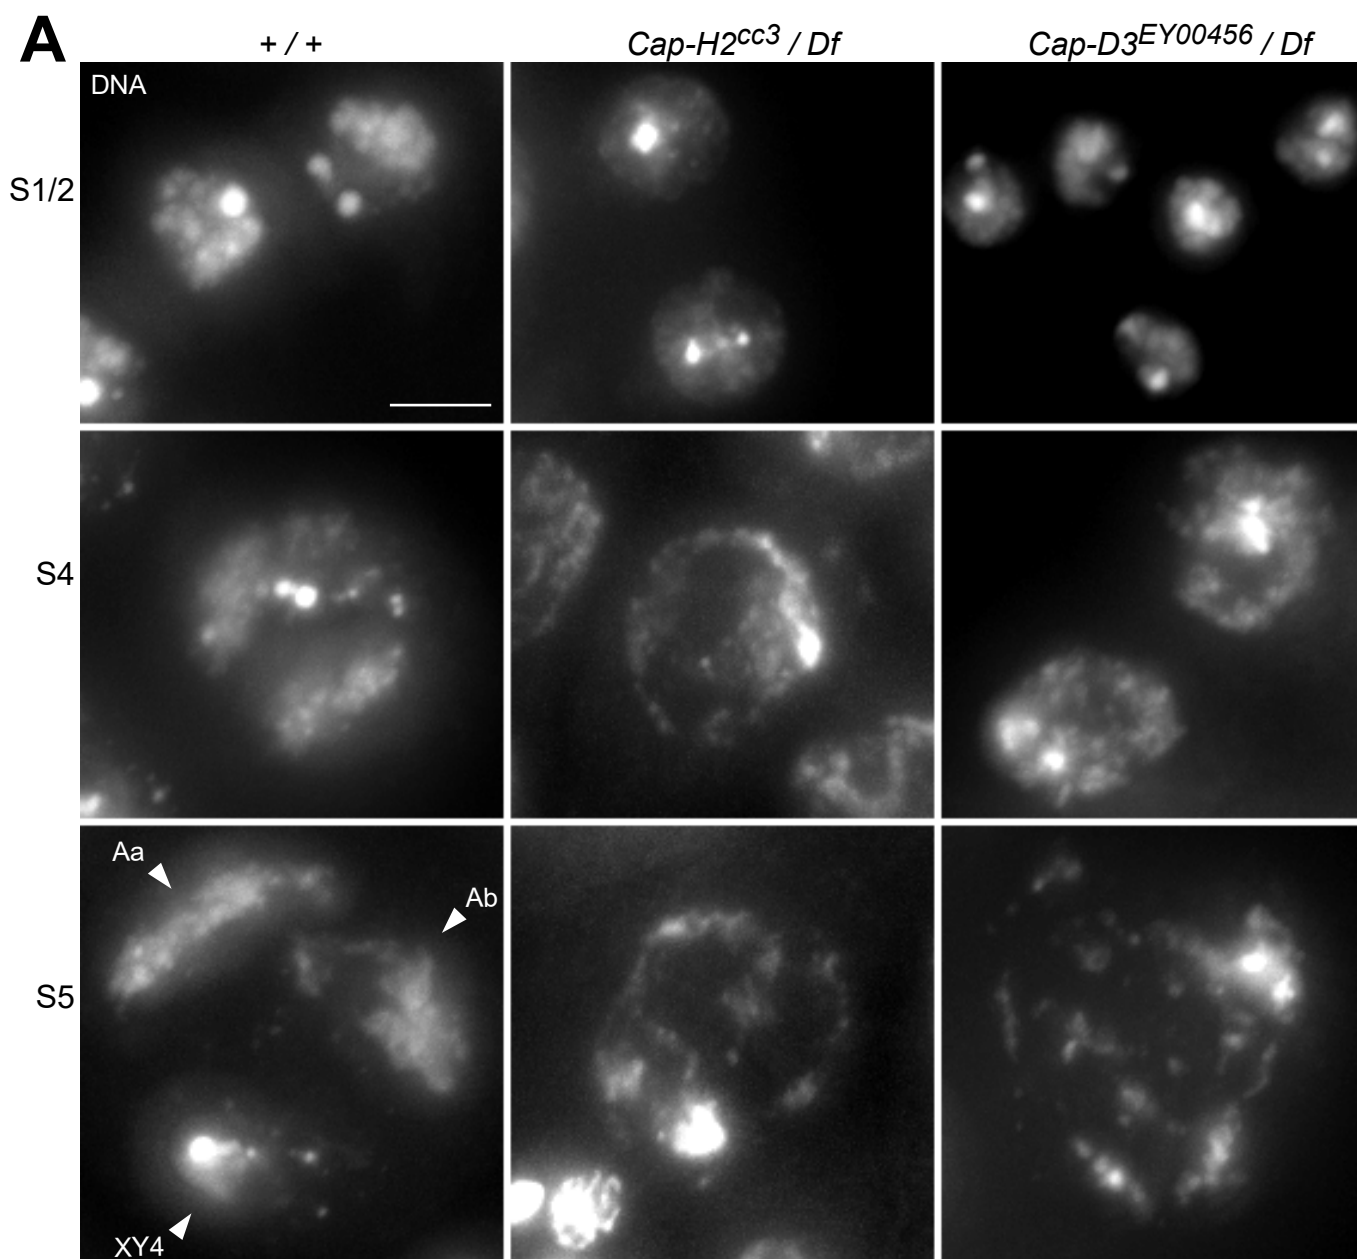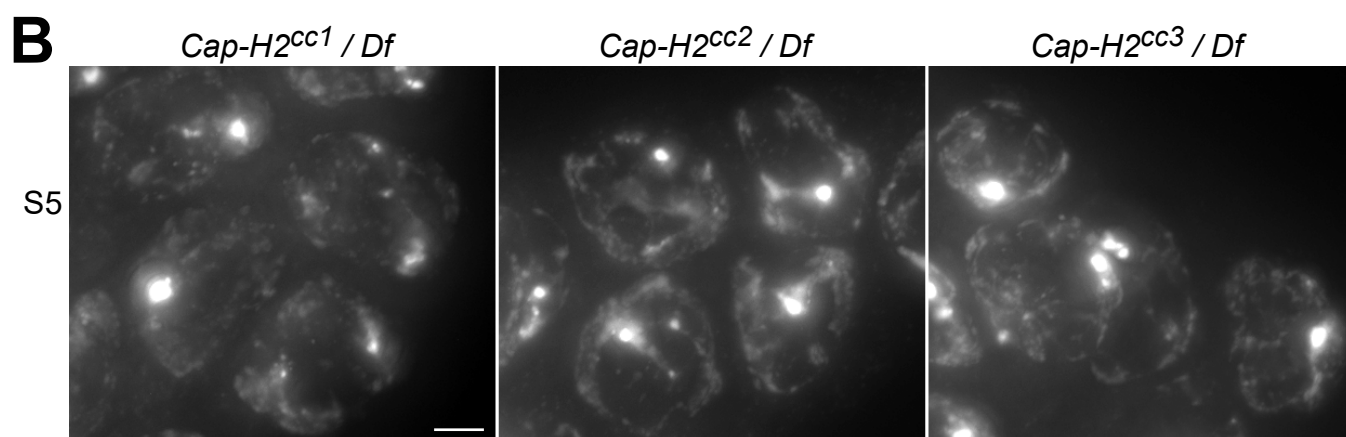

Supplement: pgen.1009870.s004.pdf [file pgen.1009870.s004.pdf]
