# Supplementary material for: Bivalent individualization during chromosome territory formation in Drosophila spermatocytes by controlled condensin II protein activity and additional force generators
Source: PubMed Central journal article supplement (PMC8559962; doi:10.1371/journal.pgen.1009870), 2021-10-20
Supplement: pgen.1009870.s006.pdf [file pgen.1009870.s006.pdf]

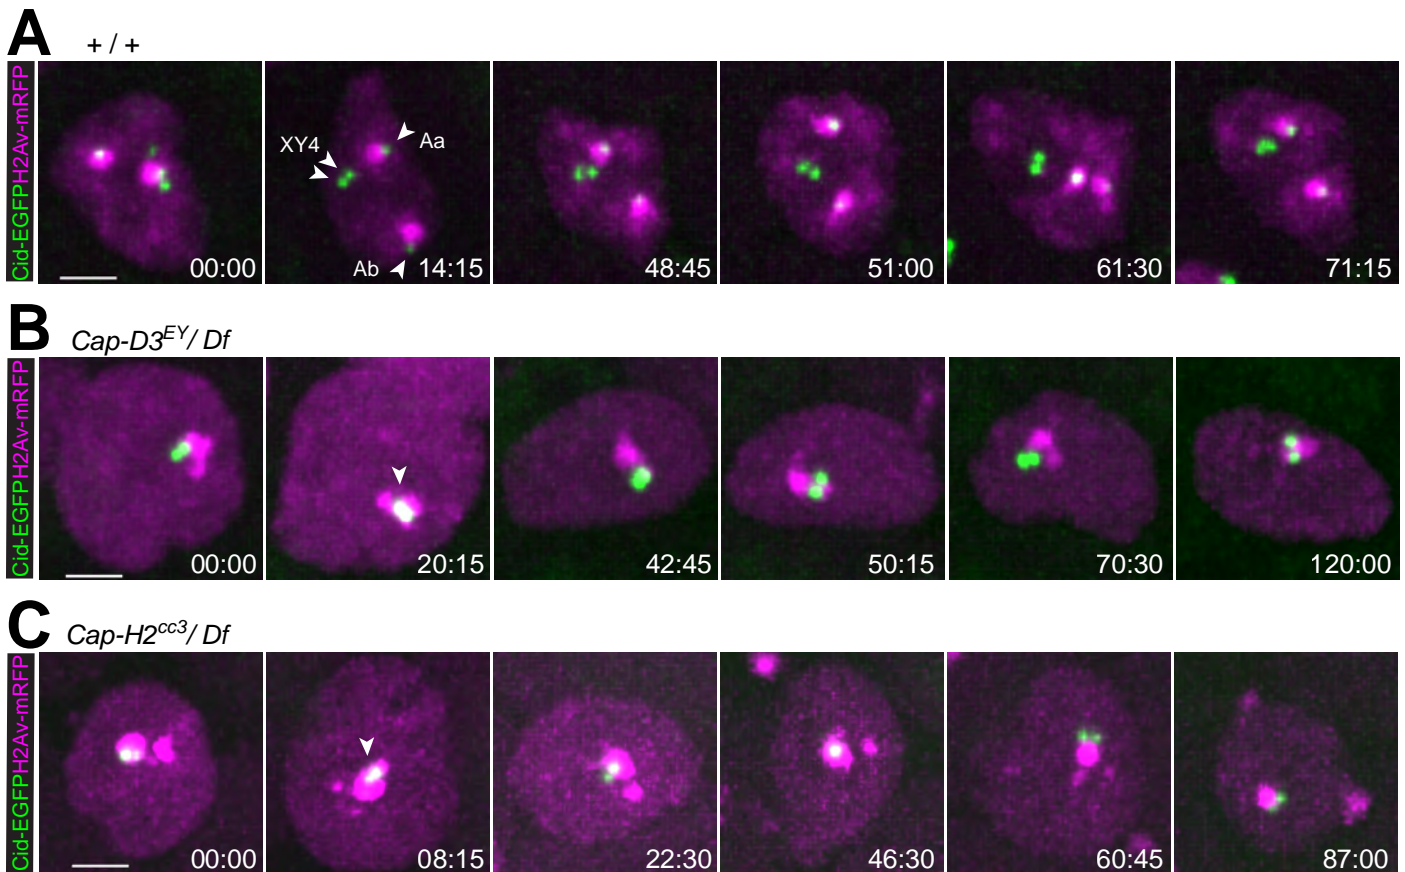

**S6 Figure. Condensin II proteins are required for chromocenter and centromere cluster dissociation in somatic cyst cells.**

(A - C) Time lapse imaging of His2Av-mRFP and Cenp-A/Cid-EGFP was applied for analysis of cyst cells in late spermatocyte. Time (min:sec) is indicated relative to the onset of imaging. Scale bars = 3  $\mu$ m.

(A) In controls (+ / +), cyst cells displayed four Cid-EGFP dots in the nucleus during the S6 stage and during progression through M I. Two of these dots were in close proximity to each other, but well separated from the two additional dots. Each of these latter two dots was closely associated with a prominent His2Av-mRFP blob. Presumably, each of the four Cid-EGFP dots represents an unresolved pair of tightly associated homologous centromeres. The two Cid-EGFP dots close to His2Av-mRFP blobs (arrowheads Aa and Ab) are proposed to represent the clustered centromeres of chr2 and 3, respectively, adjacent to pericentromeric heterochromatin. Consequentially, the two closely paired Cid-EGFP dots (arrowheads XY4) are the paired chr4 centromeres and the paired centromeres of the sex chromosomes, respectively. A close spatial association of chr4 with sex chromosomes occurs also in spermatocytes and oocytes.

(B,C) in *Cap-D3* mutants (*Cap-D3<sup>EY</sup>/Df*) (B) and in *Cap-H2* mutants (*Cap-H2<sup>cc3</sup>/Df*) (C), only one or two closely adjacent Cid-EGFP dots were present (arrowheads). Moreover, these Cid-EGFP dots were brighter than in control cyst cells and next to only a single enlarged His2Av-mRFP blob. Thus, without condensin II proteins, cyst cell nuclei contain a chromocenter with an associated centromere cluster, while condensin II promotes the dissociation of chromocenter and centromere clusters in normal cyst cells.
