# Supplementary material for: Bivalent individualization during chromosome territory formation in Drosophila spermatocytes by controlled condensin II protein activity and additional force generators
Source: PubMed Central journal article supplement (PMC8559962; doi:10.1371/journal.pgen.1009870), 2021-10-20

**A***bam* > *RedX*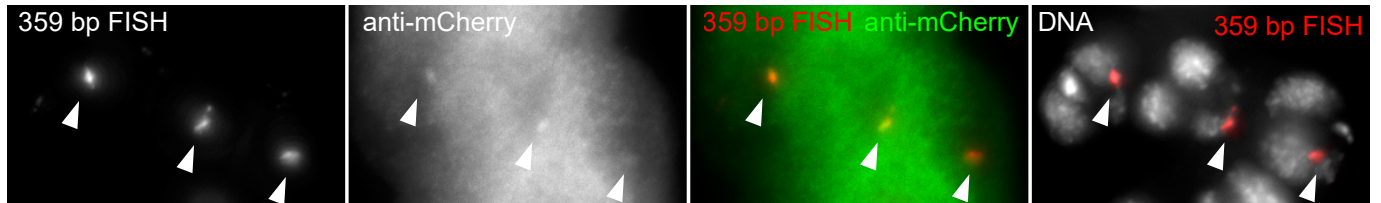*bam* > *Green2/3*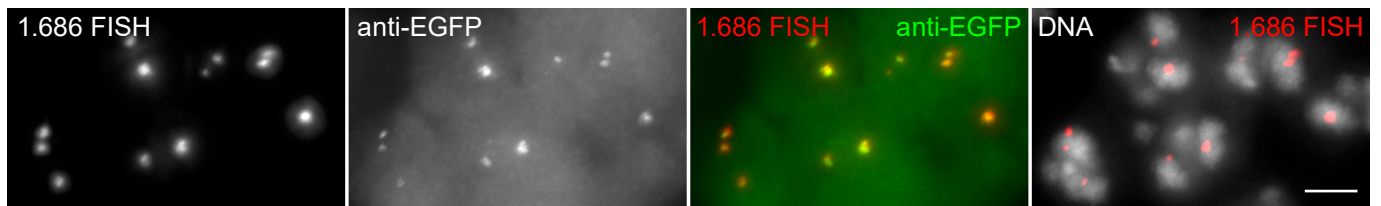**B***bam* > *RedX Green2/3*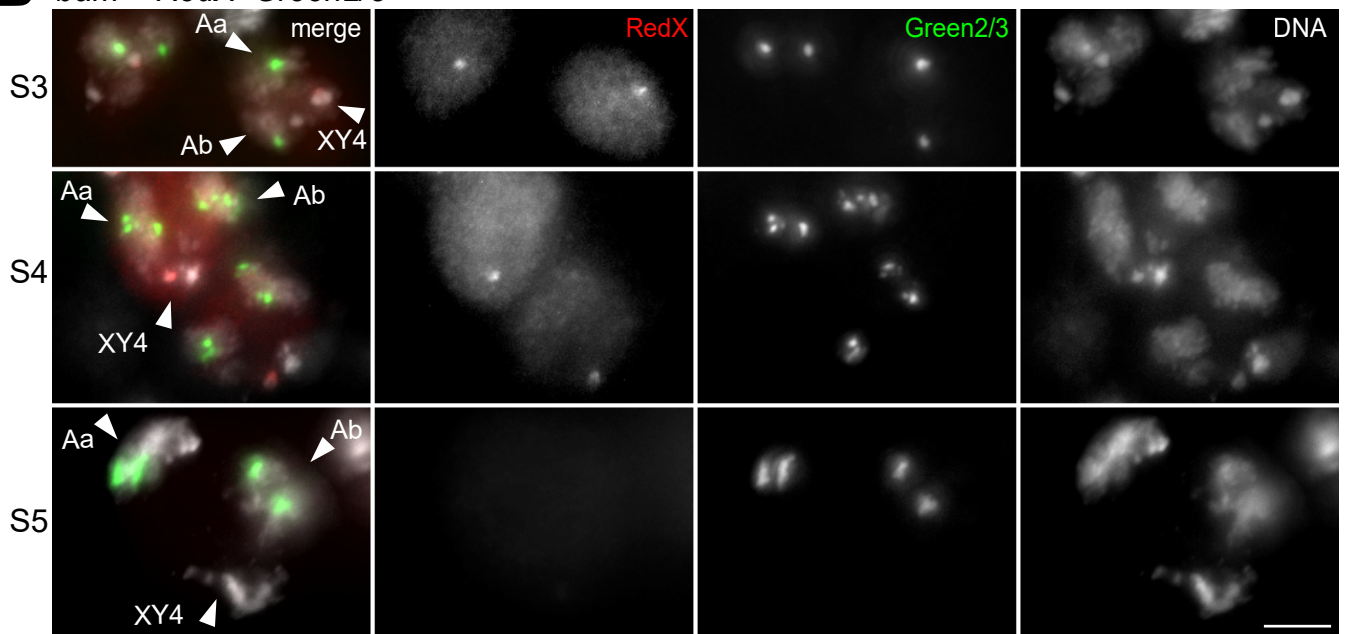

Supplement: pgen.1009870.s007.pdf [file pgen.1009870.s007.pdf]
